# Temporal Analysis of Social Determinants Associated with COVID-19 Mortality

Shayom Debopadhaya  
debops@rpi.edu  
Rensselaer Polytechnic Institute  
Troy, New York, USA

John S. Erickson  
erickj4@rpi.edu  
Rensselaer Polytechnic Institute  
Troy, New York, USA

Kristin P. Bennett  
bennek@rpi.edu  
Rensselaer Polytechnic Institute  
Troy, New York, USA

## ABSTRACT

This study examines how social determinants associated with COVID-19 mortality change over time. Using US county-level data from July 5 and December 28, 2020, the effect of 19 high-risk factors on COVID-19 mortality rate was quantified at each time point with negative binomial mixed models. Then, these high-risk factors were used as controls in two association studies between 40 social determinants and COVID-19 mortality rates using data from the same time points. The results indicate that counties with certain ethnic minorities and age groups, immigrants, prevalence of diseases like pediatric asthma and diabetes and cardiovascular disease, socioeconomic inequalities, and higher social association are associated with increased COVID-19 mortality rates. Meanwhile, more mental health providers, access to exercise, higher income, chronic lung disease in adults, suicide, and excessive drinking are associated with decreased mortality. Our temporal analysis also reveals a possible decreasing impact of socioeconomic disadvantage and air quality, and an increasing effect of factors like age, which suggests that public health policies may have been effective in protecting disadvantaged populations over time or that analysis utilizing earlier data may have exaggerated certain effects. Overall, we continue to recognize that social inequality still places disadvantaged groups at risk, and we identify possible relationships between lung disease, mental health, and COVID-19 that need to be explored on a clinical level.

## CCS CONCEPTS

• Applied computing → Health informatics.

## KEYWORDS

COVID-19 mortality, social determinants of health, temporal analysis, socioeconomic inequality

## ACM Reference Format:

Shayom Debopadhaya, John S. Erickson, and Kristin P. Bennett. 2021. Temporal Analysis of Social Determinants Associated with COVID-19 Mortality. In *Proceedings of Sample Conference Title (ACM '21)*. ACM, New York, NY, USA, 10 pages. <https://doi.org/10.1145/nnnnnnn.nnnnnnn>

Permission to make digital or hard copies of all or part of this work for personal or classroom use is granted without fee provided that copies are not made or distributed for profit or commercial advantage and that copies bear this notice and the full citation on the first page. Copyrights for components of this work owned by others than ACM must be honored. Abstracting with credit is permitted. To copy otherwise, or republish, to post on servers or to redistribute to lists, requires prior specific permission and/or a fee. Request permissions from [permissions@acm.org](mailto:permissions@acm.org).

ACM '21, XXXX, 2021,

© 2021 Association for Computing Machinery.

ACM ISBN 978-x-xxxx-xxxx-x/YY/MM... \$15.00

<https://doi.org/10.1145/nnnnnnn.nnnnnnn>

## 1 INTRODUCTION

The growing prevalence of COVID-19 has forced the pandemic to be the center of state and national policy in the United States (US). As of July 5, 2020, the CDC documented over 130,000 COVID-19 deaths in the US [24], and this number increased to over 300,000 COVID-19 deaths by December 28, 2020 [62]. This increase in deaths is not uniformly distributed, and several counties are experiencing much higher-than-average death rates [49]. It is hypothesized that social determinants have contributed to these disparities in COVID-19 mortality [1], which we investigate. Social determinants, such as a county's access to healthcare, rates of education, indicators of health, and economic status have greatly impacted other diseases [14], so these factors may play a similar role in COVID-19.

An increasing amount of literature highlights that social determinants of COVID-19 place socioeconomically disadvantaged populations at heightened risk. Abrams and Szefer reviews emerging literature to discuss the stark inequality of COVID-19 infection rates and outcomes among several groups [1]. This work recognizes that social determinants such as housing problems, race, smoking, nutrition, overcrowding, poverty, and comorbidities may compromise an individual to COVID-19. Ahmed et al. is another among the many to describe the disproportionate effects of COVID-19 among the socioeconomically disadvantaged, highlighting access to healthcare as one of the many determinants that are potentially critical in COVID-19 mortality [2]. Fielding-Miller et al. studies a few select social determinants to find that dense population in urban counties, non-English speakers, farm workers, and impoverished groups in non-urban counties are at increased risk [22]. Overall, the literature emphasizes that quantifying the social determinants of COVID-19 is a crucial step in addressing the existing health inequalities. Yet, there is a lack of well-controlled, diverse screening of the social determinants associated with COVID-19. Moreover, as the COVID-19 pandemic is rapidly changing, temporal analysis is needed to understand how the effects of these socioeconomic factors respond to the implementation of systemic protections.

To address the gap in the current literature and leverage readily available data, this study identifies and compares which social determinants are associated with county-level changes in COVID-19 mortality rates on July 5 and December 28, 2020. Through this temporal analysis, we uniquely utilize a comprehensive list of comorbidities, social determinants, and the impact of differing state policies to explore the nationwide effect of socioeconomic disparities.

## 2 METHODS

This study consists of an initial ecological analysis to establish which high-risk factors from literature have statistically significant

relationships to COVID-19, using pandemic mortality data updated to July 5 and December 28, 2020. Then, the high-risk factors are used as controls for two social determinant association studies - one using the COVID-19 mortality data updated until July 5 and one using COVID-19 mortality data updated until December 28. These dates were selected to avoid the volatile increase in COVID-19 infections in the two weeks following major US holidays [41]. 40 social determinants are evaluated at each time point to find which ones affect COVID-19 mortality. Both the two initial analyses and the two follow-up association studies utilize negative binomial mixed models to analyze county level data (n=3093 counties). Results are statistically corrected for possible false discoveries. Further sensitivity analysis with different model variants and additional time-series analysis are also validated. This study design is summarized in Figure 1.

County-level COVID-19 mortality data on July 5 and December 28, 2020 was sourced from John Hopkins University Center for Systems Science and Engineering [19]. While COVID-19 mortality rates change over the course of this study, the data for high-risk factors and social determinants are long-term characteristics of a county and remain constant throughout this study. Data for high-risk factors and social determinants were sourced from the US Census[10], County Health Rankings [54], JHU-CSSE [19], the Center of Disease Control (CDC) Wonder [67], American Lung Association [6], and several other data sources. The same risk factor and social determinants datasets were used for the July 5 and December 28, 2020 analyses since they were measured before the pandemic. All data is publicly accessible, and all methods and results are reproducible. The full R code and a supplementary document with complete list of data sources can be found on the Rensselaer IDEA Github<sup>1</sup>.

## 2.1 Identifying High-Risk Factors For COVID-19 using July 5 and December 28, 2020 Data

A robust set of controls needed to be established before screening for social determinants [40]. To find the most important risk factors, we considered the guidelines from the CDC. Using extensive meta-analysis, the CDC recognized that those suffering from several diseases and ethnic minorities are at a higher risk for severe illness and death due to COVID-19 [26]. Our analysis accounts for these well-documented risk factors, using available data for the racial distribution in the US [10], as well as data for several of the highest risk comorbidities, such as the prevalence of cardiovascular death, diabetes, and COPD [6, 54, 67]. Income and education levels were used to briefly explore socioeconomic status [2]. A breakdown of population density by quartile was used as a proxy to categorize the urban or rural identity of a county. Additionally, temporal variables such as days since first infection and days since a mask is required were included to adjust for disease progression and emerging policy in each state, as this would greatly affect mortality rates of any region [19]. As several other metrics of policy were previously tested and had little significance in aggregate data, they were omitted from this analysis [18]. Variables were scaled by subtracting the mean from each data point and dividing by the standard deviation.

<sup>1</sup>[https://github.com/TheRensselaerIDEA/COVIDMINDER/tree/master/social\\_determinants\\_paper](https://github.com/TheRensselaerIDEA/COVIDMINDER/tree/master/social_determinants_paper)

Using county-level data for the entire U.S. (n=3093), negative binomial mixed models were used to find the significant high-risk factors. The modeling method was a generalization of those used in a prior study on the impact of air pollution on COVID-19 mortality [68]. The county COVID-19 mortality rate was used as the observed variable. The following explanatory variables were used: percent of county that is African American, percent of county that is Hispanic, percent of county that is Native American, percent of county that is Asian, percent of county that is White, percent of county with less than a high-school education, percent of county that is above the age of 65, percent of county that has diabetes, percent of county with COPD, percent of adults in the county who smoke, population density in quartiles, days since first infection, days since mask required, available hospital beds per county population, median household income of a county, and cardiovascular death rate. An offset to scale for population and a term to account for random variance at the state level was also included [18, 68, 69]. This analysis was performed twice, using COVID-19 mortality data updated up to July 5, 2020 and up to December 28, 2020.

The extracted output from this model is the the ratio of change in COVID-19 mortality rate per 1 standard deviation increase in each explanatory variable. We refer to this output as Mortality Rate Ratio (MRR) [68]. In this initial analysis of high-risk factors, these explanatory variables reveal the important baseline effects that must be controlled for when screening for social determinants.

## 2.2 Screening for Social Determinants

The same high risk factors from the methods above were used as controls for the two social determinant screenings. This study design allows for the identification of unique social determinants that are distinguishable from the already recognized high-risk factors.

For the social determinant screening, 40 negative binomial mixed models (each with high-risk factors as controls) were used in the association analysis to individually test 40 variables that represent a wide range of social determinants. This set of determinants included metrics of a county's mental health, physical health, rates of disease, economic status, housing burdens, education, demographics, and multiple death rates, sourced from County Health Rankings [54]. The analysis produces a MRR for each of the 40 determinants at each of the 2 time points. A complete list of the tested explanatory variables and their sources can be found in the supplementary document.<sup>1</sup>

This analysis was performed using the COVID-19 mortality data from both July 5, 2020 and December 28, 2020, producing two sets of statistically significant social determinants associated with COVID-19 mortality.

## 2.3 Statistical Testing

Each explanatory variable in the high-risk models and each variable in the 40 social determinant association models were tested for statistical significance using a Wald test [66]. The Benjamini-Hochberg Procedure [7] was used to adjust p-values for Multiple Hypothesis Testing in the social determinant screening. Our models showed robustness in this process, as the false discovery rate was acceptably below 0.05 at 0.0297 and 0.012 for July 5 and December

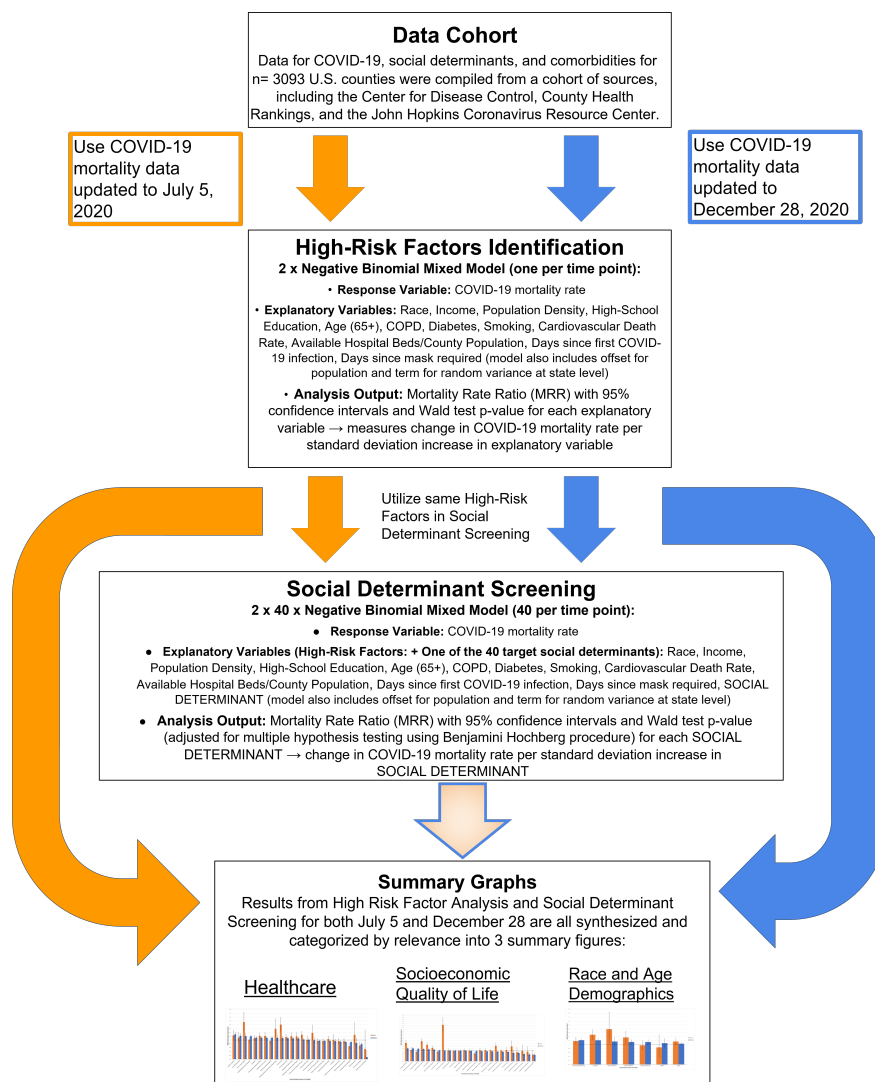

**Figure 1: Study Design Flowchart.** The chart shows the methodology from the data aggregation in the Data Cohort, to the initial ecological analysis in the High-Risk Factors Identification stage, use of High-Risk Factors in the Social Determinant Screening, and combination of High-Risk Factors analysis and Social Determinant Screening results into Summary Graphs. The orange arrows on the left denote the use of COVID-19 mortality data updated until July 5, 2020. The blue arrows on the right denote the use of COVID-19 mortality data updated until December 28, 2020. The larger orange and blue curved arrows and the mixed blue border/orange gradient arrow indicates how high-risk factors and social determinants for both dates are synthesized in the Summary Graphs.

28 models, respectively. A 95% confidence interval was also produced for each term's MRR. The 95% confidence interval and the p-value is indicated displayed on each bar on Figures 2, 3, and 4.

To test performance and fit, the procedure from Wu et al. was followed [68]. The negative binomial mixed model for the high-risk factors using July 5, 2020 data was compared to zero inflated, fixed negative binomial, and spatial correlation variants. These models were compared to the negative binomial mixed model using AIC and BIC. The main high-risk model was also analyzed at 16 different time points for robustness. Additionally, variants of the model that

excluded New York city data and excluded counties with less than 10 cases were analyzed for robustness. Statistical variations produced no significantly different results. Model was also robust to short-term time-series analysis. Any changes in results due to different sample stratification can be found in the supplementary document.

All analysis was conducted in R [48] using the lme4 package, and visualizations were created using Microsoft Excel. Notebooks to reproduce all results can be found on the Rensselaer IDEA Github.

### 3 RESULTS

The results from the high risk analyses on July 5 and December 28 data were aggregated with the results from the two social determinant screenings. Then, this combination of analysis was categorized by relevance into 3 distinct sections for temporal comparison: "Healthcare", "Socioeconomic Quality of Life", and "Race and Age Demographics". For each of the corresponding section figures, the MRR of each term is presented as a multiple of 1. A MRR above 1 indicates a predicted increase in mortality, and a value below 1 indicates a predicted decrease in mortality. A term is considered statistically significant if its 95% confidence interval does not cross the threshold of MRR of 1.

#### 3.1 Healthcare

The Healthcare category combines the prevalence of smoking and prevalence of COPD from the high-risk analyses with several social determinants related to quality of healthcare and other metrics of population health. These results are presented in Figure 2.

#### 3.2 Socioeconomic Quality of Life

The Socioeconomic Quality of Life category combines the median household income, population density, education (percent of adults in county without high-school education), days since first infection, and days since mask required variables from the high risk factors analyses with several social determinants that define a county's living and working conditions. These results are presented in Figure 3.

#### 3.3 Race and Age Demographics

The Race and Age Demographics category combines the racial composition of a county and percent of county above 65 years old from the high risk analyses with the social determinant of percent of county that is less than 18 years of age. These results are presented in Figure 4.

## 4 DISCUSSION

This study conducts temporal analysis of social determinants and comorbidities at the national scale with a wide variety of controls and county level data from July 5 and December 28, 2020. We reveal the high-risk factors and the specific social determinants of a county that affect the mortality rate of COVID-19.

### 4.1 Healthcare

This section discusses the results presented in Figure 2.

**4.1.1 Reduced Access to High Quality Healthcare:** On July 5, one standard deviation increase in preventable hospitalization rate and percent of uninsured population was associated with a 1.11 and 1.40 times increase in COVID-19 mortality rate, respectively (1.11 and 1.40 MRR). By December 28, only preventable hospitalization rate had statistical significance (1.06 MRR). These social determinants are direct indicators of quality of healthcare. Overuse of hospitals typically indicates that outpatient care is inadequate or that there is limited available primary care [53]. Counties that were ill-equipped for their population pre-pandemic may continue to be inadequate to their populations during a pandemic, leading to more COVID-19

deaths. A high percent of uninsured individuals also indicates poor access to health care. In general, those without access to health insurance will not be given thorough preventative care, often resulting in undiagnosed health problems or severe illness [30], which may result in more COVID-19 deaths. As these determinants were found to have an MRR above 1, we recognize that poor healthcare is associated with increased COVID-19 mortality.

One standard deviation increase in average number of physically unhealthy days in the county and percent of county population with poor or fair health was associated with a 1.29 and 1.47 COVID-19 MRR on July 5, respectively. By December 28, only the effect of percent of county with poor or fair health remained statistically significant (MRR of 1.10). These findings suggest that counties with poor health outcomes before the pandemic have poor COVID-19 outcomes. Unhealthy counties may have a high prevalence of common underlying health conditions, which places them at increased risk to COVID-19, as recognized by the CDC [51]. Poor access to healthcare also has a likely role in the increased COVID-19 mortality rate in these counties, as poor mental and physical health has been linked to socioeconomic disadvantage [65]. However, it is possible that the decreasing statistical significance for physically unhealthy days and the decreasing MRR of poor or fair county health indicate that the effect of socioeconomic disadvantage and poor healthcare decreases throughout the pandemic.

One standard deviation increase in a county's cancer death rate was associated with a 1.11 times increase in COVID-19 death rate on July 5, 2020. This MRR decreased to 1.06 by December 28. Higher cancer death rate can result both from increased incidence and unfavorable outcomes due to poor access to healthcare. High cancer mortality rates indicate that a community has insufficient prevention, early diagnosis, and treatment [60]. Low income communities are notably at a disadvantage for cancer treatment due to a lack of resources, as wealth disparities are noted as the most common cause of health disparities [4]. We recognize cancer prevalence as a likely comorbidity and predictor of poor healthcare, which increases risk of COVID-19.

**4.1.2 Suicide, Mental Health Provider Rate, and Excessive Drinking:** We observed a statistically significant, negative relationship (MRR<1) between age-adjusted suicide rate and excessive drinking with COVID-19 mortality rate (0.84 and 0.85 MRR by July 5, respectively). The impact of these effects approached an MRR of 1 by December (0.94 and 0.89 MRR, respectively). Meanwhile, the relationship between mental health provider rate and COVID-19 mortality, which is statistically insignificant in July, has a statistically significant MRR of 0.95 in December. This suggests a complex relationship between the pandemic and the recent epidemic of "deaths of despair": deaths from suicide, overdose, alcoholism, and self-harm. Alcohol is a coping strategy for mass stress and isolation, and consumption increased greatly after the pandemic began [38]. Suicide rates are higher in less urban areas and lower in more urban areas while the reverse is true for COVID-19 mortality rates [37]. While supporting effective social distancing, social isolation is a major risk factor for suicide [11]. The negative relationship of suicide and alcohol consumption with COVID-19 deaths are likely only temporary as suicide rates and alcohol abuse are likely to increase

Temporal Analysis of Social Determinants Associated with COVID-19 Mortality

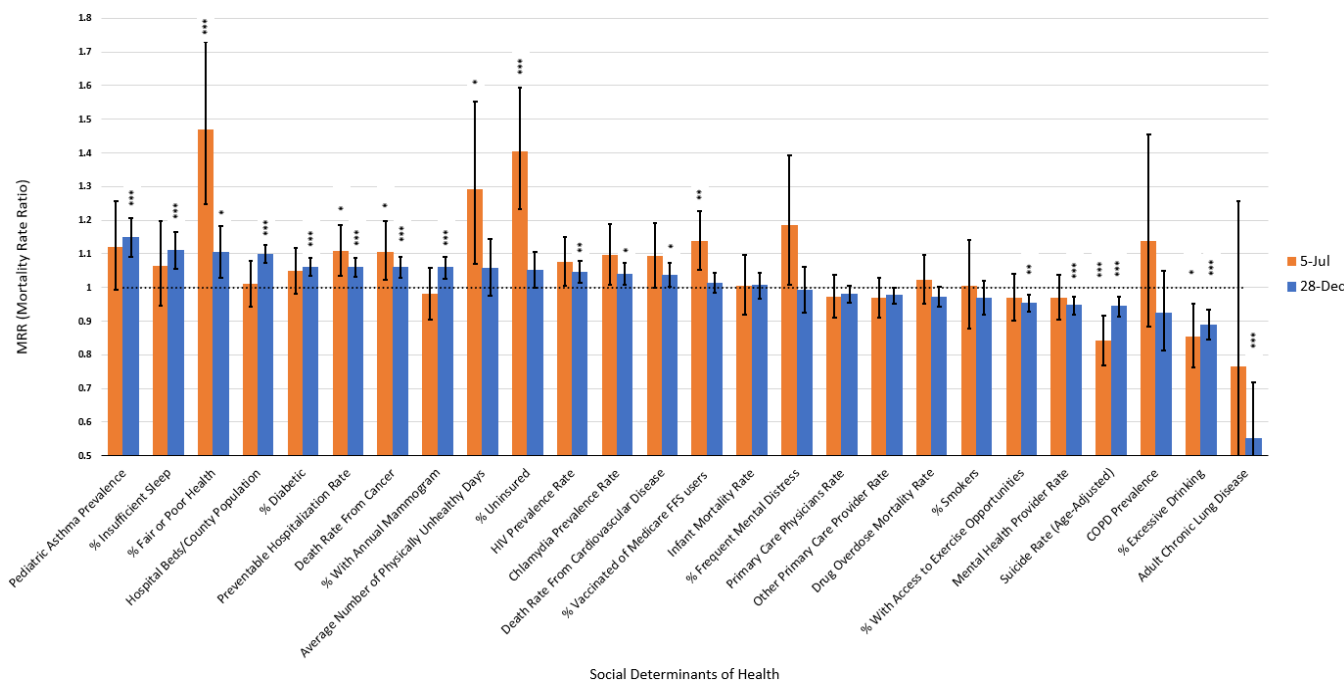

**Figure 2: Mortality Rate Ratios Associated with Healthcare.** The vertical axis shows Mortality Rate Ratio. The horizontal axis lists terms related to healthcare. The bars indicate a term’s respective MRRs at each time point. Bars are colored in orange to indicate analysis from July 5, 2020 data or colored in blue to indicate analysis from December 28, 2020 data. A dotted horizontal line indicates an MRR of 1, which represents no change in mortality rate. Each bar is labelled with its 95% confidence intervals and statistically significant, Benjamini-Hochberg corrected p-values are indicated as follows: \* = p<0.05; \*\* = p<0.01; \*\*\* = p<0.001.

during the pandemic [34]. However, the emergence of higher mental health provider rates (indicating better access to mental health care) as a protective determinant suggests that mental health has a non-trivial, intricate relationship with COVID-19, and further work is needed to fully understand what we observe.

**4.1.3 Vaccination Rates and Annual Mammogram Rates in Medicare FFS:** Influenza vaccination rates among Medicare Fee For Service (FFS) users was determined to have a 1.14 MRR in July but was not significant in December. Inversely, annual mammogram rates among Medicare FFS users was statistically insignificant in July but had a 1.06 MRR in December. One explanation for this result is that elderly groups in community care and those with pre-existing conditions like cardiovascular disease vaccinate and get screened for breast cancer more frequently. 83.1% of Medicare FFS users are above the age of 65 [43], and flu vaccinations are more common in individuals above 65 years old (72.3%) compared to those between 18 and 64 years old (30.7%) [23]. Flu vaccination rates are also higher in patients with comorbidities like cardiovascular disease in comparison to patients without cardiovascular disease [3]. Similarly, as there is an increased risk of breast cancer with age, increased mammogram screening among FFS users may represent elderly populations and groups with comorbidities [25]. These groups are more vulnerable COVID-19 [26], so the overall observed relationship between mammogram and vaccination rates in FFS

users may reflect an underlying relationship between at-risk groups and COVID-19. However, as there are severe geographical, racial, and socioeconomic disparities in influenza vaccination rates [35], future analysis of vaccination, mammogram rates, and COVID-19 mortality is needed to reveal more about this complex relationship.

**4.1.4 Lung Disease:** Surprisingly, one standard deviation increase in adult chronic lung disease in a county was associated with a statistically significant decrease in COVID-19 mortality rate in December (0.76 MRR) but was not significant in July. Rather than protective, the CDC identified several lung diseases (asthma, COPD, lung cancer) as a possible COVID-19 comorbidity [28]. While previous literature has observed this effect in asthma, this effect was not previously reported in other lung diseases [18]. As the tested COPD factor has no statistical significance at July or December, it suggests that lung disease other than COPD may have an increased statistical importance. Moreover, pediatric asthma was observed to have the opposite effect to adult chronic lung disease. Pediatric asthma was statistically insignificant on July 5, but was associated with a 1.15 MRR by December 28. As increased transmission of COVID-19 has been implicated in youth, the predicted increase in mortality from pediatric asthma may indicate a risk from greater youth populations in a county [20]. Overall, further analysis with specific lung disease subtypes is needed to better characterize the observed associations with lung disease.

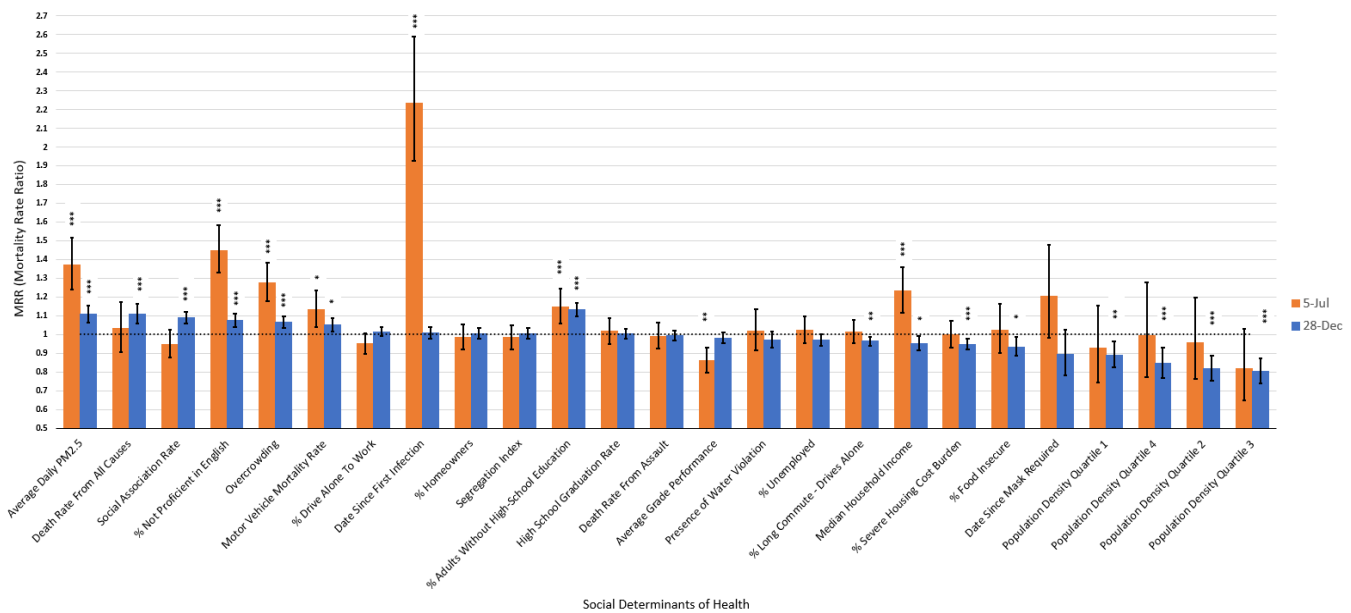

**Figure 3: Mortality Rate Ratios Associated with Socioeconomic Quality of Life.** The vertical axis shows Mortality Rate Ratio. The horizontal axis lists terms related to socioeconomic and regional characteristics. The bars indicate a term’s respective MRRs at each time point. Bars are colored in orange to indicate analysis from July 5, 2020 data or colored in blue to indicate analysis from December 28, 2020 data. A dotted horizontal line indicates an MRR of 1, which represents no change in mortality rate. Each bar is labeled with its 95% confidence intervals and statistically significant, Benjamini-Hochberg corrected p-values are indicated as follows: \* =  $p < 0.05$ ; \*\* =  $p < 0.01$ ; \*\*\* =  $p < 0.001$ .

**4.1.5 Sexually Transmitted Diseases (STDs):** One standard deviation increase in chlamydia prevalence rate and HIV prevalence rate was associated with a 1.09 and 1.07 times increase in COVID-19 mortality rates by July 5. By December, chlamydia and HIV prevalence had MRRs of 1.04 and 1.05. Chlamydia prevalence has been linked to minority women populations, and is related to several increases in mortality like cervical cancer and various inflammatory conditions [15, 32]. HIV prevalence is an indirect metric of high-risk behaviors such as unsafe sex and intravenous drug use [29]. Both HIV and chlamydia prevalence also indicate significant burdens on healthcare resources [45, 47]. We theorize that the prevalence of both of these STDs likely increase a county’s COVID-19 mortality rate directly and indirectly.

**4.1.6 Sleep, hospital beds/population, diabetes, cardiovascular disease, and exercise:** Several other high-risk factors and determinants that were statistically insignificant by July 5 were observed to be significant by December 28. Percent of county with insufficient sleep (less than seven hours a night), hospital beds per population, prevalence of diabetes, and death rate cardiovascular disease were all associated with increased COVID-19 mortality (1.11, 1.10, 1.06, and 1.04 MRR, respectively). Meanwhile, percent of county with access to exercise opportunities was associated with a decrease in mortality (0.95 MRR). Diabetes and cardiovascular disease have been recognized as comorbidities, which may increase risk of severe complications from COVID-19 infection [26]. Regular exercise has been previously associated with positive health outcomes, and we observe that it continues to have a protective role in COVID-19

[17]. In contrast, insufficient sleep has been linked to an increased chance of severe chronic diseases like diabetes [58], and we find that this destructive effect may extend to COVID-19. The ratio of hospital beds per population is one measure of available healthcare resources, and a higher ratio is traditionally implicated with more urbanization [13, 61], so our results may suggest an increased risk of COVID-19 in urban environments, rather than a direct relationship between hospital beds availability and increased COVID-19 mortality rates.

**4.1.7 Other health-related factors:** The other health-related factors we tested were statistically insignificant in the high-risk models and social determinant analyses in both time points. Infant mortality rate, ratio of primary care physicians to population, ratio of primary care clinicians other than physicians to population, prevalence of smoking, and prevalence of COPD appear to lack significance in aggregate data, despite some of these factors having literature about interactions with COVID-19 [26]. Including a large number of terms in the models may have diminished the effect of these factors. It is also possible that these factors may be regionally significant, and further analysis is needed at the sub-national level.

## 4.2 Socioeconomic Quality of Life

This section discusses the results presented in Figure 3.

**4.2.1 Disease Progression:** The temporal variable of days since first infection has a high, statistically significant MRR of 2.23 for July 5 but was not observed to be significant by December 28. We

Temporal Analysis of Social Determinants Associated with COVID-19 Mortality

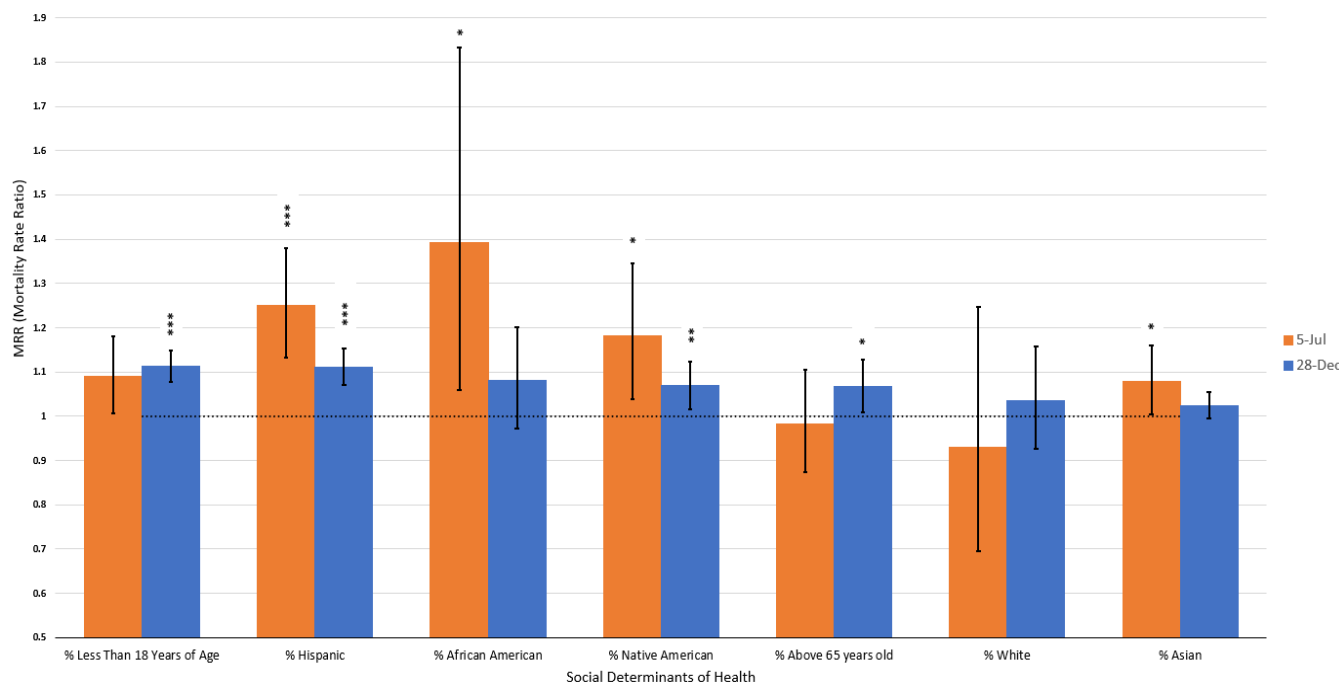

**Figure 4: Mortality Rate Ratios Associated with Race and Age Demographics.** The vertical axis shows Mortality Rate Ratio. The horizontal axis lists terms related to race and age demographics. The bars indicate a term’s respective MRRs at each time point. Bars are colored in orange to indicate analysis from July 5 or colored in blue to indicate analysis from December 28. A dotted horizontal line indicates an MRR of 1, which represents no change in mortality rate. Each bar is labelled with its 95% confidence intervals and statistically significant, Benjamini-Hochberg corrected p-values are indicated as follows: \* =  $p < 0.05$ ; \*\* =  $p < 0.01$ ; \*\*\* =  $p < 0.001$ .

likely observe that an early incidence of COVID-19 in a county is associated with the greatest increase in COVID-19 mortality, likely due to outlier metropolitan areas like New York City. It is also possible that as the pandemic progressed, the improved clinical experience of treating COVID-19, appropriate resources, and better compliance with social distancing is responsible for the statistically insignificant finding in December.

**4.2.2 Income:** One standard deviation increase in county median income was associated with a 1.23 times increase in COVID-19 mortality (1.23 MRR, July 5). However, this changed to show a protective value of 0.95 MRR by December. In a traditional view of social determinants, higher income is associated with lower rates of disease [9]. One explanation for our initial finding between income and COVID-19 is that urban counties, where income is higher [8], were disproportionately affected by COVID-19 in the initial months. Over time, the traditionally implicated protective benefits likely had a greater impact on health outcomes, which is responsible for the protective MRR by December.

**4.2.3 Immigrant Communities:** One standard deviation increase in percent of individuals not proficient in English was associated with a 1.49 increase in COVID-19 mortality in July. This decreased to a MRR of 1.07 by December. As of 2013, the percentage of Limited English Proficient (LEP) people who were foreign born was 81.3% [70]. Hence, these results suggest that immigrant populations are

at higher risk from COVID-19, which is supported by previous work [22]. Historically, immigrants suffer from poverty, and many immigrants are barred from receiving healthcare programs such as Medicare in their first 5 years of living in the US. Additionally, undocumented immigrants are not eligible for any public programs. It is estimated that around 45% of documented immigrants and 65% of undocumented immigrants do not receive healthcare. This leaves the population much more vulnerable. LEP immigrants also receive lower quality of care and understanding of their medical condition due to language barriers in treatment [70]. Additionally, the observed decrease in MRR from 1.49 to 1.07 is consistent with the trend about the effects of socioeconomic disadvantage on COVID-19, as discussed above. Overall, immigrant populations are recognized to be at a higher risk for severe outcomes due to lower access and poorer quality of care.

**4.2.4 Poverty & Severe Housing Problems:** One standard deviation increase in overcrowding, a measure of poor socioeconomic status [16], was associated with a 1.27 COVID-19 MRR by July 5. This variable is defined as the ratio of residences with more than one person per room to the total number of housing units in a county. Overcrowding is a metric of severe housing problems, previously associated with poor mental health outcomes [59], tuberculosis [59], and several other diseases [46]. Beyond signifying poor socioeconomic status, there is also physical risk with any infectious disease from

813 overcrowding due to close proximity of potential carriers [5]. The  
814 MRR for overcrowding decreased to 1.06 by December 28, which  
815 is consistent with the decreasing trend in other explorations of  
816 socioeconomic disadvantage and COVID-19 in this study. However,  
817 despite the decreasing effect, the MRR of overcrowding in a county  
818 is still associated with a significant increase of COVID-19 mortality.  
819 In contrast, however, percent of county with severe housing bur-  
820 den, defined as families spending more than 50% of their income on  
821 housing, was negatively associated with COVID-19 mortality rate  
822 (0.95 MRR, December 28). Similarly, percent of county that is food  
823 insecure, defined as percent of population without adequate access  
824 to food, was also negatively associated with a COVID-19 mortality  
825 rate (0.93 MRR, December 28). Both of these social determinants  
826 are implicated in socioeconomically disadvantaged counties and  
827 are related to lower access to healthcare [50, 55]. One possibility  
828 is that systemic, socioeconomic intervention during the pandemic  
829 may be responsible for this finding, which some literature highlight  
830 as a possible method to combat the expected, negative effects of  
831 poverty [42].  
832

833 **4.2.5 Air Pollution:** One standard deviation increase in average  
834 daily air pollution was associated with a 1.37 increase in COVID-19  
835 mortality rate in July 5, which decreased to 1.11 MRR by December  
836 28. This finding supports Wu et al.'s results, indicating that counties  
837 with long-term air pollution are more likely to fall severely ill [68],  
838 although the impact of air pollution is observed to be decreasing  
839 over time and may need further study.  
840

841 **4.2.6 Education:** One standard deviation increase in percent of  
842 adults in county without high school education was associated  
843 with a 1.15 and 1.13 COVID-19 MRR in July and December, respec-  
844 tively. Average grade performance, defined as the outcomes of 3rd  
845 grade reading scores compared to the national average, was associ-  
846 ated with a 0.86 MRR in July, but had no statistical significance by  
847 December. High school graduation rate in a county was associated  
848 with no statistical significance at either time point. Education is a  
849 well-studied determinant of adolescent health [64], and lower high  
850 school graduation has been specifically linked to poorer health  
851 outcomes in the past [39]. Moreover, grade performance is a met-  
852 ric for available educational opportunities [21] and a predictor of  
853 future health outcomes [31]. Our findings suggest that a county's  
854 educational resources and quality, as reported by average grade  
855 performance and graduation rate, may have some protective effects  
856 in July, but have no measurable effects by December. However, the  
857 consistent, destructive relationship between the percent of adults  
858 without a high school education and COVID-19 still suggests that  
859 poor education can increase health risks.  
860

861 **4.2.7 Motor Vehicle Mortality Rate and Long Commute:** One stan-  
862 dard deviation increase in motor vehicle mortality rate was as-  
863 sociated with a 1.13 COVID-19 MRR on July 5. Increased motor  
864 vehicle mortality rate has been associated with counties with high  
865 uninsurance and high concentrations of ethnic minorities [36]. As  
866 discussed above, those with poor health care and certain minorities  
867 have an increased risk to COVID-19. Additionally, increased motor  
868 vehicle mortality rate is also associated with populations under the  
869 age of 18 [36], which we did find to be significantly associated with  
870 increased COVID-19. While this effect of motor vehicle mortality

871 decreased to 1.05 MRR in December 28, we observed a statistically  
872 significant 0.96 MRR in December for percentage of county that  
873 drives alone and has a commute over 30 minutes. While this so-  
874 cial determinant is traditionally associated increased obesity, less  
875 physical exercise, and worse mental health [52], we hypothesize  
876 that the transition to working from home may have a role in the  
877 protective MRR. While physical health benefits of working from  
878 home still need to be further elucidated, other benefits like mental  
879 health have been well-documented [44]. Overall, it is likely that the  
880 relationship between motor vehicle mortality rate, long commutes  
881 while driving alone, and COVID-19 has factors beyond the scope  
882 of this study, so future work is needed to fully understand this  
883 relationship.  
884

885 **4.2.8 Social Association and Death Rate from All Causes:** The re-  
886 lationships from county's social association rate and cumulative  
887 death rate from all causes were both statistically insignificant in  
888 July but had significant COVID-19 MRRs of 1.09 and 1.11 by Decem-  
889 ber, respectively. Although social association of a county through  
890 membership associations has been previously associated with posi-  
891 tive health outcomes, increased social interaction may lead to a  
892 higher number of COVID-19 deaths [56]. Meanwhile, counties with  
893 high rates of all causes of mortality before the pandemic likely  
894 suffer from a mix of negative underlying living, healthcare, and  
895 working conditions. It is likely that the effects of both of these social  
896 determinants were statistically obscured by other factors in July,  
897 but the larger amount and more reliable data over time reveal their  
898 significance in December.  
899

900 **4.2.9 Other Socioeconomic Factors:** The other factors related to  
901 socioeconomic status that we tested were statistically insignificant  
902 in the high-risk models and social determinant associations at both  
903 times. These include percent of county that drives alone to work  
904 (without a long commute), percent of county that are homeowners,  
905 a county's segregation index, death rate from assault, presence of  
906 water violation, unemployment rates, and days since mask required.  
907 As discussed above, including a large number of terms in the model  
908 may have diminished the effect of these factors and they may need  
909 further analysis at regional levels.  
910

## 911 4.3 Race and Age Demographics

912 This section discusses the results presented in Figure 4.  
913

914 **4.3.1 Race:** Our results suggest that race was a better predictor of  
915 COVID-19 in July than in December. Counties experienced 1.25 and  
916 1.18 MRR increases in COVID-19 mortality per standard deviation  
917 increase in Hispanic and Native American populations by July 5,  
918 respectively. These MRRs decreased to 1.11 and 1.07 by December  
919 28, respectively. Additionally, while percent of African Americans  
920 and Asians in a county was associated with 1.39 MRR and 1.02 in  
921 July, there was no statistically significant relationship in December.  
922 Meanwhile, percent of county that is White was not statistically  
923 significant in either time point. Historically, ethnic minorities have  
924 disadvantaged access to healthcare, occupational opportunities,  
925 higher chronic stress, lower access to quality education, and more  
926 housing problems, which can contribute to health outcomes [27].  
927 We conclude these racial inequalities have a role in the increased  
928



COVID-19 mortality rate, but they are observed to have a decreasing impact throughout the progression of the pandemic.

4.3.2 *Age*: In contrast, we observe an increasingly strong relationship between age and COVID-19. While neither percent of county above 65 years old nor percent below 18 years old was significant by July, both terms were significant by December 28 (1.07 and 1.11 MRR, respectively). While other literature has recognized elderly populations as at risk [26], we additionally find that an increase in youth in a county is associated with an increase in COVID-19 mortality. Youth have been suspected to be a source of transmission [20], which may be responsible for this finding.

## 5 CONCLUSION

Overall, we identify that counties with Hispanic and Native American ethnic minorities, populations under 18 and above 65 years of age, worse healthcare resources, higher social association, higher prevalence of comorbidities like pediatric asthma and diabetes and cardiovascular disease, more overcrowding, higher motor vehicle mortality, earlier exposure to COVID-19, higher vaccination rates and mammogram screenings among Medicare FFS users, and higher air pollution continue to have an increased risk of COVID-19 mortality. Like other diseases [14], we recognize that the severity of COVID-19 is greatly worsened by socioeconomic inequality. Additionally, the temporal trends observed in this study suggest that the policies implemented during this pandemic may have been effective, as the impact of several socioeconomic metrics (overcrowded housing, immigrant populations, poor health in a county) appear to significantly decrease over time. However, future analysis is needed to further support this finding, and to additionally explore the decreasing impacts of air pollution and income, and the increasing impact of age demographics.

Care must be taken in contextualizing these results due to inherent limitations of county-level ecological studies. The relationships observed in aggregate data cannot be translated from the county level to individuals from an ecological study alone. Rather, these studies identify useful trends and hypotheses for future analysis at the individual level [63]. Accounting for possible confounds is also essential in ecological studies, which we achieve by including several controls in every model. Other limitations of the study stem from the availability and accuracy of the data. Literature suggests that both the reported counts of infection and the reported COVID-19-related deaths have inconsistencies [12, 57], and the lack of proper testing has also been highlighted [33]. Moreover, changes in reporting measures and standards of care over the study period may result in a regression to the mean, which should also be considered in temporal analysis.

As more detailed information becomes available, it would prove useful for future study to verify our results using clinical and individual-level data. Further investigation of the relationship between COVID-19 and adult chronic lung disease may be especially valuable, as there is currently varying evidence. Additionally, the relationships between COVID-19, poverty, air quality, income, age, motor vehicle mortality rate, vaccination rate, breast cancer screening rate, mental health, and alcohol consumption need to be elucidated in more detail. These analyses may reveal further interactions between social determinants and COVID-19 mortality.

## ACKNOWLEDGMENTS

This study was supported by the Rensselaer Institute for Data Exploration and Applications, the Data INCITE Lab, and United Health Foundation grant 1990. Additionally, thank you to Ariella D. Sprague, Hongxi Mou, Tiburon L. Benavides, Sarah M. Ahn, and Cole A. Reschke for their contributions to an earlier version of this work.

## REFERENCES

- [1] Elissa M Abrams and Stanley J Szefer. 2020. COVID-19 and the impact of social determinants of health. *The Lancet. Respiratory Medicine* (2020).
- [2] Faheem Ahmed, Na'eem Ahmed, Christopher Pissarides, and Joseph Stiglitz. 2020. Why inequality could spread COVID-19. *The Lancet. Public Health* 5, 5 (2020), e240.
- [3] Umed A Ajani, Earl S Ford, and Ali H Mokdad. 2005. Examining the coverage of influenza vaccination among people with cardiovascular disease in the United States. *American Heart Journal* 149, 2 (2005), 254–259.
- [4] Kassandra I Alcaraz, Tracy L Wiedt, Elvan C Daniels, K Robin Yabroff, Carmen E Guerra, and Richard C Wender. 2020. Understanding and addressing social determinants to advance cancer health equity in the United States: A blueprint for practice, research, and policy. *CA: A Cancer Journal for Clinicians* 70, 1 (2020), 31–46.
- [5] D Amicizia, RT Micale, BM Pennati, F Zangrillo, M Iovine, E Lecini, F Marchini, PL Lai, and D Panatto. 2019. Burden of typhoid fever and cholera: similarities and differences. Prevention strategies for European travelers to endemic/epidemic areas. *Journal of Preventive Medicine and Hygiene* 60, 4 (2019), E271.
- [6] American Lung Association. 2020. Estimated prevalence and incidence of lung disease. Retrieved December 28, 2020 from <https://bit.ly/2OKx6Yg>
- [7] Yoav Benjamini and Yosef Hochberg. 1995. Controlling the false discovery rate: a practical and powerful approach to multiple testing. *Journal of the Royal Statistical Society: Series B (Methodological)* 57, 1 (1995), 289–300.
- [8] Ray D Bollman and William Reimer. 2009. Demographics, employment, income, and networks: Differential characteristics of rural populations. *Journal of Agromedicine* 14, 2 (2009), 132–141.
- [9] Paula Braveman and Laura Gottlieb. 2014. The social determinants of health: It's time to consider the causes of the causes. *Public health reports* 129, 1\_suppl2 (2014), 19–31.
- [10] US Census Bureau. 2021. American Community Survey Data. Retrieved December 28, 2020 from <https://bit.ly/3ulbxqm>
- [11] Raffaella Calati, Chiara Ferrari, Marie Brittner, Osmano Oasi, Emilie Olié, André F Carvalho, and Philippe Courtet. 2019. Suicidal thoughts and behaviors and social isolation: A narrative review of the literature. *Journal of affective disorders* 245 (2019), 653–667.
- [12] Center for Disease Control and Prevention. 2020. Provisional death counts for coronavirus disease (COVID-19). Retrieved December 28, 2020 from <https://bit.ly/3lm9955>
- [13] Yousef Chavehpour, Arash Rashidian, Abraha Woldemichael, and Amirhossein Takian. 2019. Inequality in geographical distribution of hospitals and hospital beds in densely populated metropolitan cities of Iran. *BMC health services research* 19, 1 (2019), 1–8.
- [14] Pasqualina M Coffey, Anna P Ralph, and Vicki L Krause. 2018. The role of social determinants of health in the risk and prevention of group A streptococcal infection, acute rheumatic fever and rheumatic heart disease: a systematic review. *PLoS Neglected Tropical Diseases* 12, 6 (2018), e0006577.
- [15] Christie MJL Cooksey, Erica K Berggren, and Jennifer Lee. 2010. Chlamydia trachomatis infection in minority adolescent women: a public health challenge. *Obstetrical & gynecological survey* 65, 11 (2010), 729.
- [16] County Health Rankings Roadmaps. [n.d.]. Severe housing problems. Retrieved December 28, 2020 from <https://bit.ly/34v0FCj>
- [17] Matheus Pelinski da Silveira, Kimberly Kamila da Silva Fagundes, Matheus Ribeiro Bizuti, Édina Starck, Renata Calciolari Rossi, and Débora Tavares de Resende e Silva. 2020. Physical exercise as a tool to help the immune system against COVID-19: an integrative review of the current literature. *Clinical and experimental medicine* (2020), 1–14.
- [18] Shayom Debopadhaya, Ariella D Sprague, Hongxi Mou, Tiburon L Benavides, Sarah M Ahn, Cole A Reschke, John S Erickson, and Kristin P Bennett. 2020. Social Determinants Associated with COVID-19 Mortality in the United States. *medRxiv* (2020).
- [19] Ensheng Dong, Hongru Du, and Lauren Gardner. 2020. An interactive web-based dashboard to track COVID-19 in real time. *Lancet Infectious Diseases* 20, 5 (2020), 533–534.
- [20] John D. Omura Krista Proia James W. Stephens Erin K. Sauber-Schatz Eva Leidman, Lindsey M. Duca. [n.d.]. COVID-19 Trends Among Persons Aged 0–24 Years — United States, March 1–December 12, 2020. Retrieved December 28,

2020 from <https://bit.ly/3a35iFU>

[21] Erin M Fahle and Sean F Reardon. 2018. How much do test scores vary among school districts? New estimates using population data, 2009–2015. *Educational Researcher* 47, 4 (2018), 221–234.

[22] Rebecca K Fielding-Miller, Maria E Sundaram, and Kimberly Brouwer. 2020. Social determinants of COVID-19 mortality at the county level. *medRxiv* (2020).

[23] Center for Disease Control. [n.d.]. FluVaxView. Retrieved December 28, 2020 from <https://bit.ly/3gn9WIH>

[24] Centers for Disease Control and Prevention. [n.d.]. Cases in the U.S. Retrieved December 28, 2020 from <https://bit.ly/32pwzOh>

[25] Centers for Disease Control and Prevention. 2020. What Are the Risk Factors for Breast Cancer? Retrieved December 28, 2020 from <https://bit.ly/3t8gSa8>

[26] Centers for Disease Control and Prevention. 2021. Do I need to take extra precautions against COVID-19? Retrieved December 28, 2020 from <https://bit.ly/3ldEqa7>

[27] Centers for Disease Control and Prevention. 2021. Health equity considerations and racial and ethnic minority groups. Retrieved December 28, 2020 from <https://bit.ly/3hr7AAm>

[28] Centers for Disease Control and Prevention. 2021. People with moderate to severe asthma. Retrieved December 28, 2020 from <https://bit.ly/2YuvHGO>

[29] Centers for Disease Control and Prevention. 2021. Ways to stop HIV Stigma and Discrimination. Retrieved December 28, 2020 from <https://bit.ly/3uDqCtt>

[30] Julia Foutz, Anthony Damico, Ellen Squires, and Rachel Garfield. 2018. The uninsured: A primer—key facts about health insurance and the uninsured under the Affordable Care Act. *Kaiser Family Foundation* 14 (2018). <https://bit.ly/2Ensg3>

[31] Michael T French, Jenny F Homers, Ioana Popovici, and Philip K Robins. 2015. What you do in high school matters: High school GPA, educational attainment, and labor market earnings as a young adult. *Eastern Economic Journal* 41, 3 (2015), 370–386.

[32] Stephen J Genuis and Shelagh K Genuis. 2004. Managing the sexually transmitted disease pandemic: a time for reevaluation. *American Journal of Obstetrics and Gynecology* 191, 4 (2004), 1103–1112.

[33] GlobalEpidemics. [n.d.]. July 6, 2020: State testing targets. Retrieved December 28, 2020 from <https://bit.ly/3j6OzUf>

[34] David Gunnell, Louis Appleby, Ella Arensman, Keith Hawton, Ann John, Nav Kapur, Murad Khan, Rory C O'Connor, Jane Pirkis, Eric D Caine, et al. 2020. Suicide risk and prevention during the COVID-19 pandemic. *The Lancet Psychiatry* 7, 6 (2020), 468–471.

[35] Laura L Hall, Liou Xu, Salaheddin M Mahmud, Gary A Puckrein, Ed W Thommes, and Ayman Chit. 2020. A Map of Racial and Ethnic Disparities in Influenza Vaccine Uptake in the Medicare Fee-for-Service Program. *Advances in Therapy* 37, 5 (2020), 2224–2235.

[36] Carrie Henning-Smith and Katy B Kozhimannil. 2018. Rural–Urban Differences in Risk Factors for Motor Vehicle Fatalities. *Health Equity* 2, 1 (2018), 260–263.

[37] Asha Z Ivey-Stephenson, Alex E Crosby, Shane PD Jack, Tadesse Haileyesus, and Marcie-jo Kresnow-Sedacca. 2017. Suicide trends among and within urbanization levels by sex, race/ethnicity, age group, and mechanism of death—United States, 2001–2015. *MMWR Surveillance Summaries* 66, 18 (2017), 1.

[38] Alison Knopf. 2020. Alcohol and isolation: Experts comment on drinking behavior during COVID-19. *Alcoholism & Drug Abuse Weekly* 32, 13 (2020), 1–4.

[39] Jungeun Olivia Lee, Rick Kosterman, Tiffany M Jones, Todd I Herrenkohl, Isaac C Rhew, Richard F Catalano, and J David Hawkins. 2016. Mechanisms linking high school graduation to health disparities in young adulthood: A longitudinal analysis of the role of health behaviours, psychosocial stressors, and health insurance. *Public health* 139 (2016), 61–69.

[40] Shuai Li and Xinyang Hua. 2020. The closer to the Europe Union headquarters, the higher risk of COVID-19? Cautions regarding ecological studies of COVID-19. *medRxiv* (2020).

[41] Lisa Lockerd Maragakis. 2020. Coronavirus, Social and Physical Distancing and Self-Quarantine. Retrieved December 28, 2020 from <https://bit.ly/3pBed8a>

[42] Amory Martin, Maryia Markhvida, Stéphane Hallegatte, and Brian Walsh. 2020. Socio-economic impacts of COVID-19 on household consumption and poverty. *Economics of disasters and climate change* 4, 3 (2020), 453–479.

[43] Lee R Mobley, Pedro Amaral, Tzy-Mey Kuo, Mei Zhou, and Srimoyee Bose. 2017. Medicare modernization and diffusion of endoscopy in FFS Medicare. *Health Economics Review* 7, 1 (2017), 13.

[44] Jodi Oakman, Natasha Kinsman, Rwth Stuckey, Melissa Graham, and Victoria Weale. 2020. A rapid review of mental and physical health effects of working at home: how do we optimise health? *BMC Public Health* 20, 1 (2020), 1–13.

[45] Department of Health and Human Services. 2021. Guidelines for the Use of Antiretrovirals Agents in Adults and Adolescents with HIV. Retrieved December 28, 2020 from <https://bit.ly/2PT8kFO>

[46] World Health Organization. 2016. What are the health risks related to overcrowding? Retrieved December 28, 2020 from <https://bit.ly/3j3VvYU>

[47] Kwame Owusu-Edusei Jr, Harrell W Chesson, Thomas L Gift, Guoyu Koh, Reena Mahajan, Marie Cheryl Bañez Ocfemia, and Charlotte K Kent. 2013. The estimated direct medical cost of selected sexually transmitted infections in the United States, 2008. *Sexually transmitted diseases* 40, 3 (2013), 197–201.

[48] R Core Team. 2019. *R: A Language and Environment for Statistical Computing*. R Foundation for Statistical Computing, Vienna, Austria. <https://www.R-project.org/>

[49] J Raifman, K Nocka, D Jones, J Bor, S Lipson, J Jay, and P Chan. [n.d.]. COVID-19 US state policy database (CUSP). Retrieved December 28, 2020 from <https://bit.ly/34scadM>

[50] County Health Rankings Roadmaps. [n.d.]. Food Insecurity. Retrieved December 28, 2020 from <https://bit.ly/3mBAGdj>

[51] County Health Rankings Roadmaps. [n.d.]. HIV prevalence\*. Retrieved December 28, 2020 from <https://bit.ly/2EpmaKd>

[52] County Health Rankings Roadmaps. [n.d.]. Long Commute Driving Alone. Retrieved December 28, 2020 from <https://bit.ly/2Qjk8kN>

[53] County Health Rankings Roadmaps. [n.d.]. Preventable hospital stays. Retrieved December 28, 2020 from <http://bit.ly/31VVi4>

[54] County Health Rankings Roadmaps. [n.d.]. Rankings Data and Documentation. Retrieved December 28, 2020 from <https://bit.ly/3wLRpph>

[55] County Health Rankings Roadmaps. [n.d.]. Severe Housing Cost Burden. Retrieved December 28, 2020 from <https://bit.ly/2Qjk8kN>

[56] County Health Rankings Roadmaps. [n.d.]. Social Associations. Retrieved December 28, 2020 from <https://bit.ly/3d6wqWg>

[57] Timothy W Russell, Joel Hellewell, Sam Abbott, CI Jarvis, K van Zandvoort, CMMID nCov working group, S Flasche, AJ Kucharski, et al. 2020. Using a delay-adjusted case fatality ratio to estimate under-reporting. *Centre for Mathematical Modeling of Infectious Diseases Repository* (2020).

[58] Azizi A Seixas, Lloyd Gyamfi, Valerie Newsome, Gabrielle Ranger-Murdock, Mark Butler, Diana Margot Rosenthal, Ferdinand Zizi, Irini Youssef, Samy I McFarlane, and Girardin Jean-Louis. 2018. Moderating effects of sleep duration on diabetes risk among cancer survivors: Analysis of the National Health Interview Survey in the USA. *Cancer management and research* 10 (2018), 4575.

[59] Ankur Singh, Lyrian Daniel, Emma Baker, and Rebecca Bentley. 2019. Housing disadvantage and poor mental health: a systematic review. *American Journal of Preventive Medicine* 57, 2 (2019), 262–272.

[60] American Cancer Society. 2019. Report: Social determinants must be addressed to advance health equity. Retrieved December 28, 2020 from <https://bit.ly/2YvgzsE>

[61] Fan Tian and Jay Pan. 2021. Hospital bed supply and inequality as determinants of maternal mortality in China between 2004 and 2016. *International journal for equity in health* 20, 1 (2021), 1–15.

[62] The New York Times. [n.d.]. Coronavirus in the U.S.: Latest Map and Case Count. Retrieved December 28, 2020 from <https://nyti.ms/3s7stF9>

[63] Jack V Tu and Dennis T Ko. 2008. Ecological studies and cardiovascular outcomes research. *Circulation* 118, 24 (2008), 2588–2593.

[64] Russell M Viner, Elizabeth M Ozer, Simon Denny, Michael Marmot, Michael Resnick, Adesegun Fatusi, and Candace Currie. 2012. Adolescence and the social determinants of health. *The lancet* 379, 9826 (2012), 1641–1652.

[65] Kristian Wahlbeck, Johanna Cresswell-Smith, Peija Haaramo, and Johannes Parkkonen. 2017. Interventions to mitigate the effects of poverty and inequality on mental health. *Social psychiatry and psychiatric epidemiology* 52, 5 (2017), 505–514.

[66] Abraham Wald. 1943. Tests of statistical hypotheses concerning several parameters when the number of observations is large. *Trans. Amer. Math. Soc.* 54, 3 (1943), 426–482.

[67] CDC WONDER. 2020. National Center for Health Statistics Mortality Data on CDC WONDER. Retrieved December 28, 2020 from <https://bit.ly/32i4aF>

[68] Xiao Wu, Rachel C Nethery, Benjamin M Sabath, Danielle Braun, and Francesca Dominici. 2020. Exposure to air pollution and COVID-19 mortality in the United States. *medRxiv* (2020).

[69] Xinyan Zhang, Himel Mallick, Zaixiang Tang, Lei Zhang, Xiangqin Cui, Andrew K Benson, and Nengjun Yi. 2017. Negative binomial mixed models for analyzing microbiome count data. *BMC Bioinformatics* 18, 1 (2017), 4.

[70] Jie Zong and Jeanne Batalova. 2015. The limited English proficient population in the United States. *Migration Policy Institute of Washington, D.C.* (2015).
